# Supplementary material for: Crystal Structure of the SPOC Domain of the Arabidopsis Flowering Regulator FPA
Source: PubMed Central journal article supplement (PMC4981400; doi:10.1371/journal.pone.0160694), 2016-08-11
Supplement: pone.0160694.s003.pdf [file pone.0160694.s003.pdf]

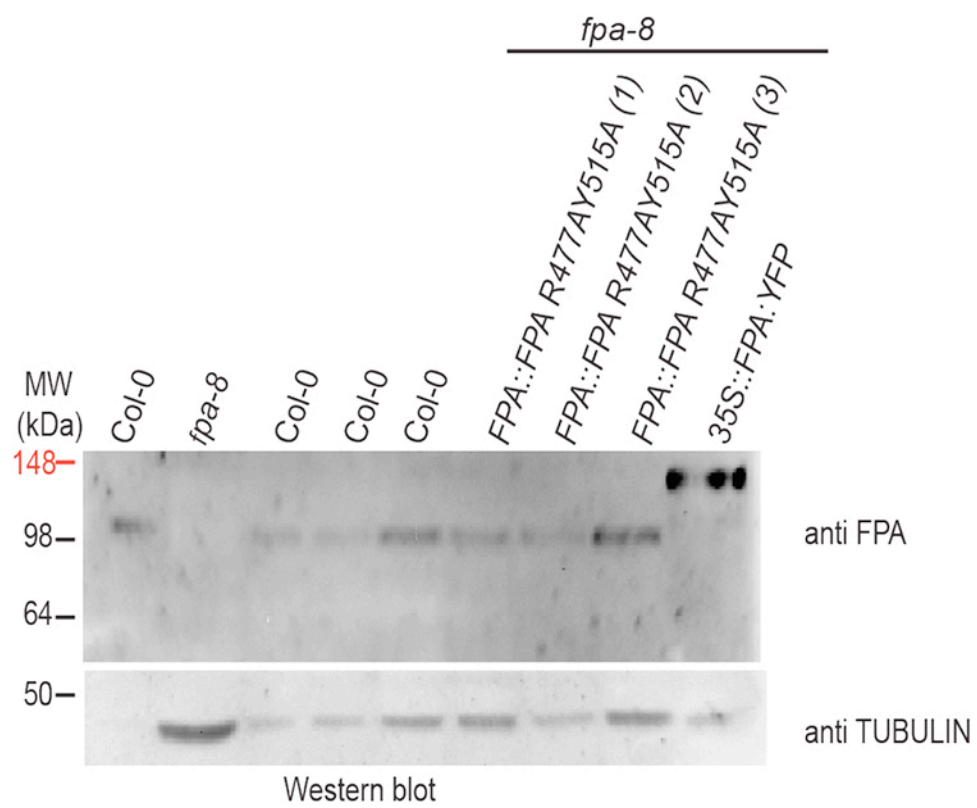

**S3 Figure.**
