# Supplementary material for: Crystal Structure of the SPOC Domain of the Arabidopsis Flowering Regulator FPA
Source: PubMed Central journal article supplement (PMC4981400; doi:10.1371/journal.pone.0160694), 2016-08-11
Supplement: pone.0160694.s004.pdf [file pone.0160694.s004.pdf]

**S1 Table.**

| Name of the final plasmid           | Name of the original plasmid  | Primer orientation | Primer sequence (5' – 3' orientation)                   |
|-------------------------------------|-------------------------------|--------------------|---------------------------------------------------------|
| <i>pGreenI 0029 FPA R477A</i>       | <i>pGreenI 0029 FPA</i>       | sense              | CTGAGGTCGTC AATTGTT CAGCA<br>GCGACTGATTTGAATATGCTCGCT   |
|                                     |                               | antisense          | AGCGAGCATATTCAAATCAGTCG<br>CTGCTGAACAATTGACGACCTCA<br>G |
| <i>pGreenI 0029 FPA Y515A</i>       | <i>pGreenI 0029 FPA</i>       | sense              | TCTTACACTGAATTTCTCCGGGCG<br>CTTAGCTCAAAGATCGGGCG        |
|                                     |                               | antisense          | CGCCCGATCTTTTGAGCTAAGCGC<br>CCGGAGAAATTCAGTGTAAGA       |
| <i>pGreenI 0029 FPA R477A Y515A</i> | <i>pGreenI 0029 FPA Y515A</i> | sense              | CTGAGGTCGTC AATTGTT CAGCA<br>GCGACTGATTTGAATATGCTCGCT   |
|                                     |                               | antisense          | AGCGAGCATATTCAAATCAGTCG<br>CTGCTGAACAATTGACGACCTCA<br>G |

Primers were used to generate a range of pGreen I 0029 vectors with mutated *FPA* genomic sequence. Name of the final clone and the vector used in the mutagenesis reaction as well as sequence of sense and antisense primers are included.
